# Supplementary material
Source: ML conference proceedings conference paper supplement (https://openaccess.thecvf.com/content/CVPRW_2019/html/Dogan_Exemplar_Guided_Face_CVPRW_2019_paper.html)
Supplement: Supplementary file 1 [file Dogan_Exemplar_Guided_Face_CVPRW_2019_supplemental.zip]

# Exemplar Guided Face Image Super-Resolution without Facial Landmarks – Supplementary Material

Berk Dogan, Shuhang Gu, Radu Timofte  
Computer Vision Lab, D-ITET, ETH Zurich

doganb@student.ethz.ch, shgu@ee.ethz.ch, radu.timofte@vision.ee.ethz.ch

This supplementary material provides the details on the network architectures used in our proposed solution from the main paper, and describes the additional images provided jointly with this pdf document.

## 1. Our Network Architectures

Table 1 provides the descriptions of the Warper (Wnet), Critic (Cnet), and Identity Encoder (Inet) subnetworks as employed in our proposed GWAInet (see Fig. 1 (Fig.2 in the paper)).

| Wnet              | Cnet       | Inet           |
|-------------------|------------|----------------|
| k3n64s1*          | k5n64s2**  | k3n64s1*       |
| k3n64s2*          | k5n128s2** | k3n64s1*       |
| k3n64s1*          | k5n256s2** | max_pool(k2s2) |
| k3n64s2*          | k5n512s2** | k3n128s1*      |
| k3n64s1*          | fc(1)      | k3n128s1*      |
| k3n64s2*          |            | max_pool(k2s2) |
| k3n64s1           |            | k3n256s1*      |
| skip start        |            | k3n256s1*      |
| 8x ResBlock       |            | max_pool(k2s2) |
| k3n64s1           |            | k3n512s1*      |
| skip end          |            | k3n512s1*      |
| pixel shuffler 2x |            | k3n512s1*      |
| pixel shuffler 2x |            | max_pool(k2s2) |
| pixel shuffler 2x |            | k3n512s1*      |
| k3n2s1            |            | k3n512s1*      |
|                   |            | k3n512s1*      |
|                   |            | max_pool(k2s2) |
|                   |            | fc(4096)*      |
|                   |            | fc(4096)*      |
|                   |            | fc(4096)       |

Table 1: Architectures of Wnet, Cnet and Inet. Note that \* and \*\* symbols refer to ReLU and LeakyReLU ( $\alpha = 0.2$ ) layers, respectively. k3n64s1 represents a convolution operation with kernel size 3x3, 64 feature maps and stride 1.

## 2. Residual Block

The structure of the residual block is shown in Figure 2.

## 3. Additional Images and Folders

### 3.1. Celeba guidance with and without matched identity

Additional images for the Figure 4 in the paper are given in *random\_celeba* folder. The image names have the following structure: **seq#\_sr\_4.type#**, where type numbers are given as

- 000 the ground truth image (high resolution,  $8\times$ ),
- 00 the guiding image with same identity,
- 0 our result (GWAInet) when the guiding image has same identity,
- 1 our result (GWAInet) when the guiding image has different identity,
- 2 the guiding image with a different identity.

### 3.2. Our results vs GFRNet [1]

Additional images for the Figure 5 in the paper are given in *additional\_comp* folder. For each image the sequence is as follows:

- 1) the guiding image (high resolution,  $8\times$ ),
- 2) the result by GFRNet [1, 2],
- 3) our result (Ours - Full / GWAInet),
- 4) the ground truth image (high resolution,  $8\times$ ).

## References

- [1] X. Li, M. Liu, Y. Ye, W. Zuo, L. Lin, and R. Yang. Learning warped guidance for blind face restoration. In *The European Conference on Computer Vision (ECCV)*, September 2018.

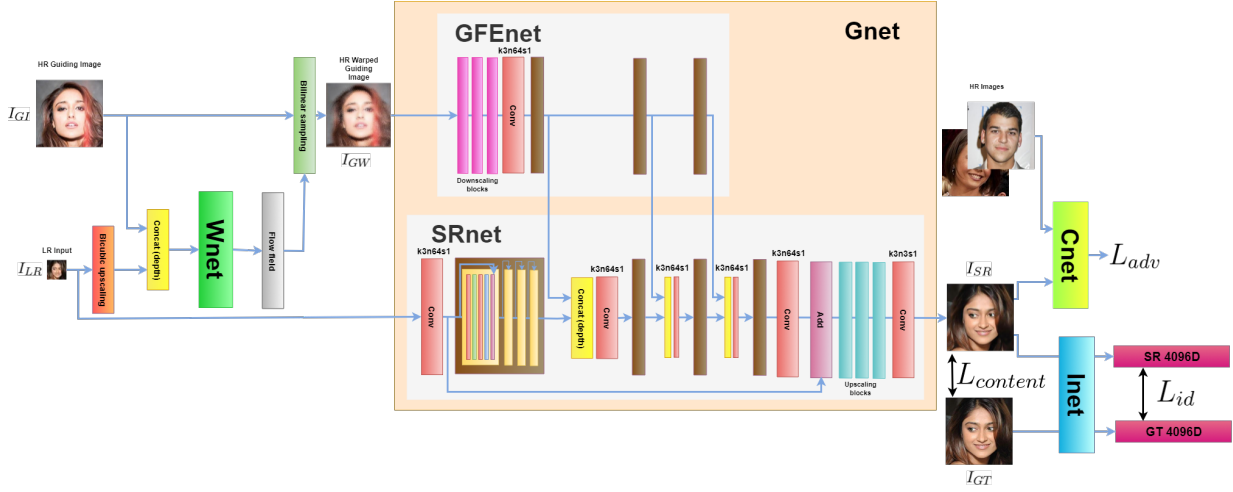

Figure 1: Proposed GWAInet and its Warper (Wnet), Generator (Gnet), Critic (Cnet) and Identity Encoder (Inet) subnetworks.

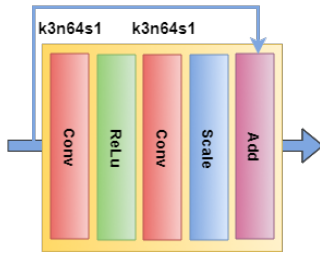

Figure 2: Residual block as introduced in [3]

- [2] X. Li, M. Liu, Y. Ye, W. Zuo, L. Lin, and R. Yang. Learning Warped Guidance for Blind Face Restoration. *ArXiv e-prints*, Apr. 2018.
- [3] B. Lim, S. Son, H. Kim, S. Nah, and K. M. Lee. Enhanced Deep Residual Networks for Single Image Super-Resolution. *ArXiv e-prints*, July 2017.
